# Supplementary material for: Proteomic Analysis of Breast Cancer Resistance to the Anticancer Drug RH1 Reveals the Importance of Cancer Stem Cells
Source: MDPI journal article supplement (doi:10.3390/cancers11070972), 2019-07-11
Supplement: s1 [file s1]

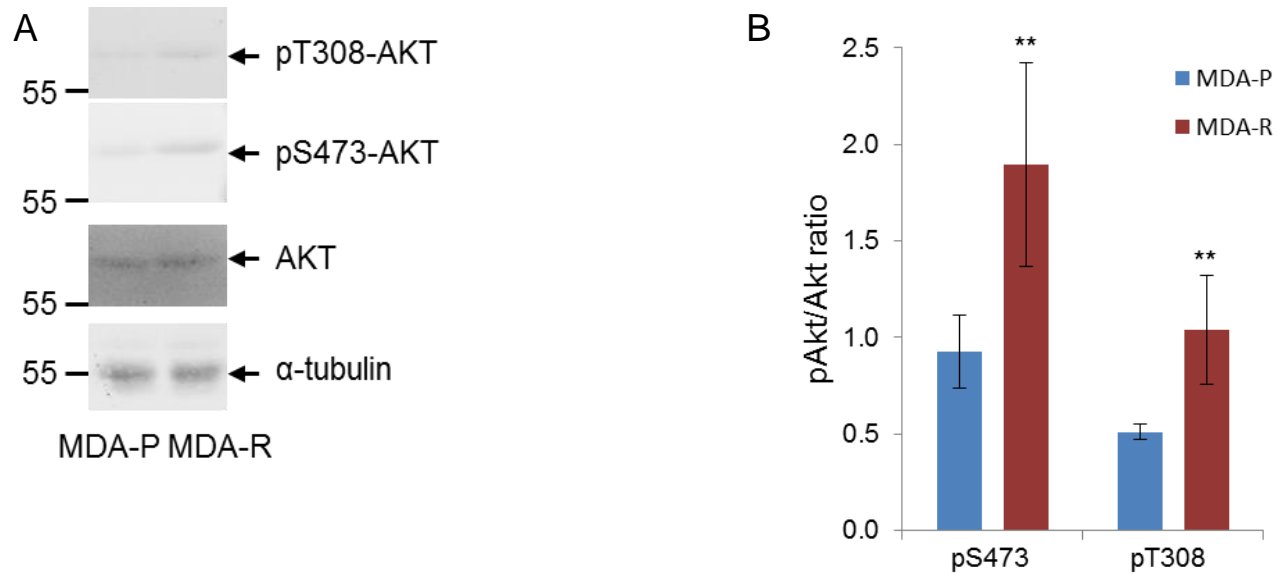

**Figure S2.** AKT phosphorylation is increased in RH1-resistant cells. A. Western blot analysis showing the level of phosphorylated AKT in MDA-P and MDA-R cells.  $\alpha$ -tubulin is shown as loading control. B. Densitometric analysis of pAKT and AKT Western blot. Bars are  $\pm$  SD, significant difference is marked by asterisks: \*\* -  $P < 0.05$ , t-test,  $n=4$ .
