# Supplementary material for: Proteomic Analysis of Breast Cancer Resistance to the Anticancer Drug RH1 Reveals the Importance of Cancer Stem Cells
Source: MDPI journal article supplement (doi:10.3390/cancers11070972), 2019-07-11
Supplement: s1 [file s1]

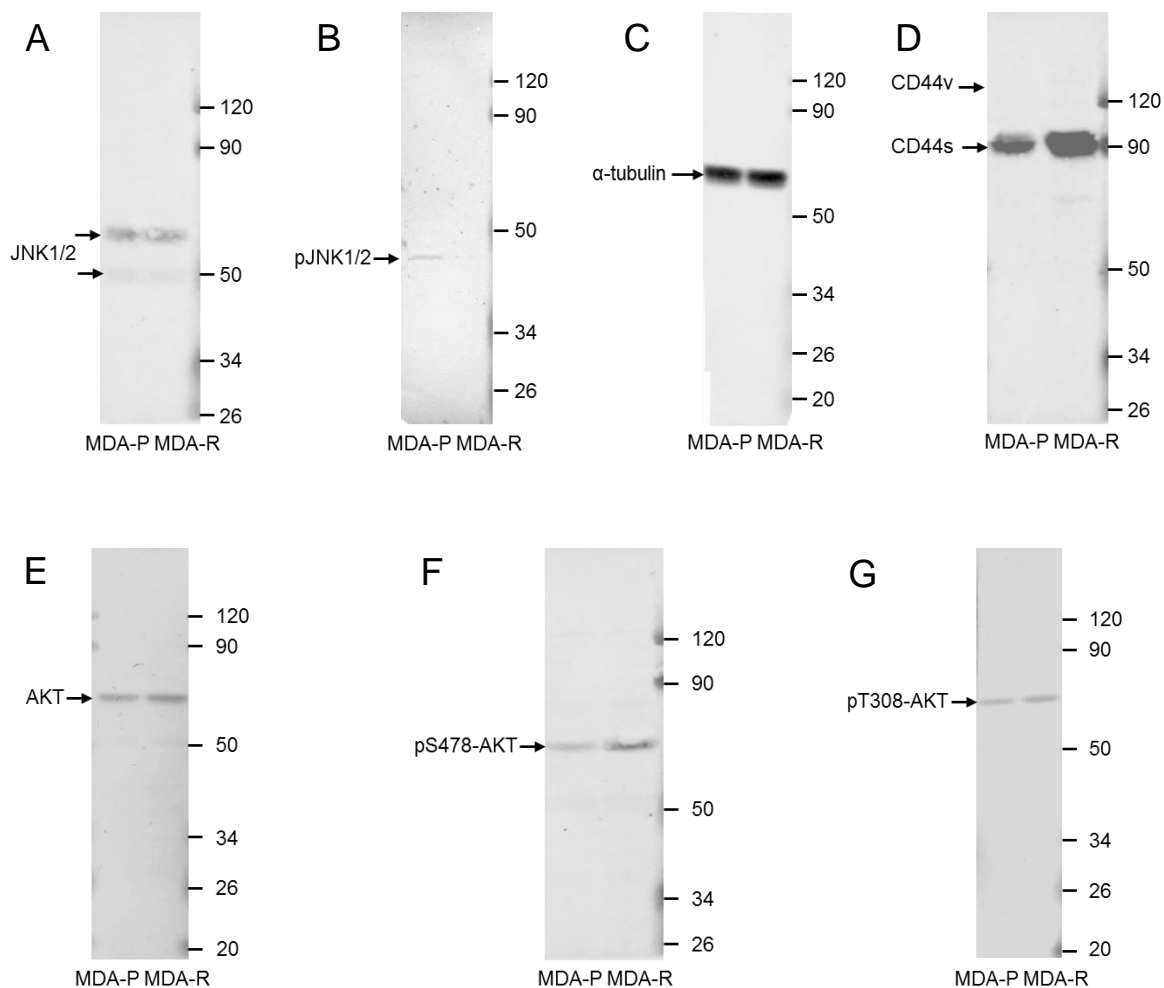

**Figure S3.** Whole Western blots for (A) JNK, (B) pJNK, (C)  $\alpha$ -tubulin, (D) CD44, (E) AKT, (F) pS478-AKT, and (G) pT308-Akt antibodies.
